# Supplementary figures and images for: Long-term safety and efficacy of antithymocyte globulin induction: use of integrated national registry data to achieve ten-year follow-up of 10-10 Study participants
Source: Springer Nature journal article supplement (doi:10.1186/s13063-015-0891-y), 2015-08-18

Validation Variables

Matching Variables

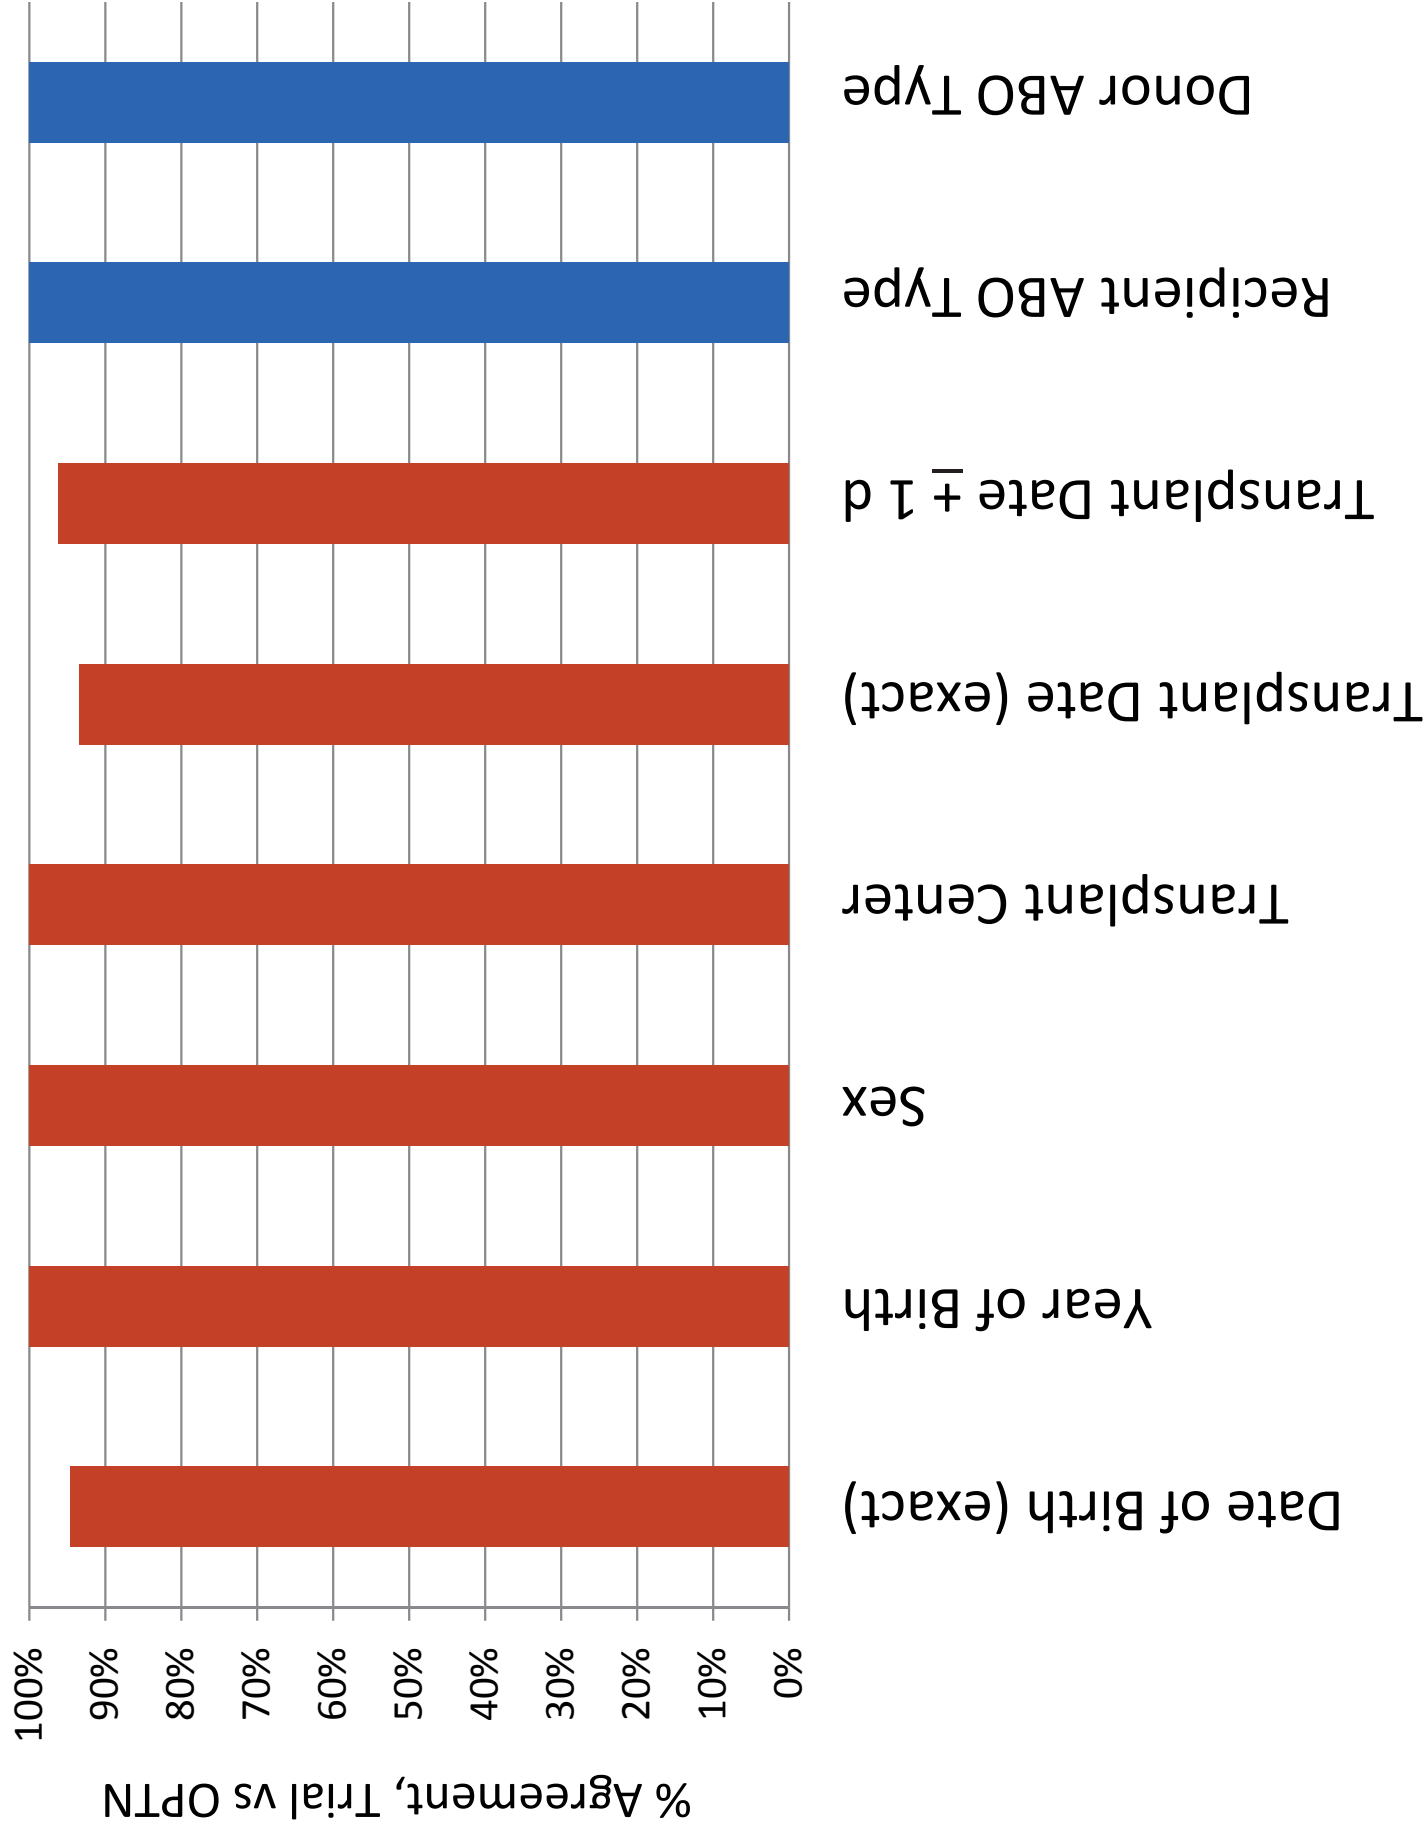

Supplement: MOESM1 [file 9782410]
